# Supplementary material for: Progressive multifocal leukoencephalopathy after durvalumab treatment for acute myeloid leukemia: A consequence of an immune reconstitution inflammatory syndrome?
Source: PubMed Central journal article supplement (PMC9422031; doi:10.1002/jha2.485), 2022-05-29

**Supplementary data:** Analysis of coinhibitory and costimulatory molecules on CD4+ (A) and CD8+(B) T cells. Coinhibitory proteins CTLA-4, CD160, BTLA, LAG3, 2B4, Tim3, PD-1, TIGIT and costimulatory proteins CD96, CD28, LIGHT expression was analyzed by flow cytometry on CD4+ T cells (CD3+ CD4+ CD8-) and CD8+ T cells (CD3+ CD4- CD8+) from the PML patient and from control patients (CP 1-8), and healthy donors (HD 1-4). Results are shown as histogram (grey: isotype control, red : specific Ab).

A

CD4+ T cells

PML patient

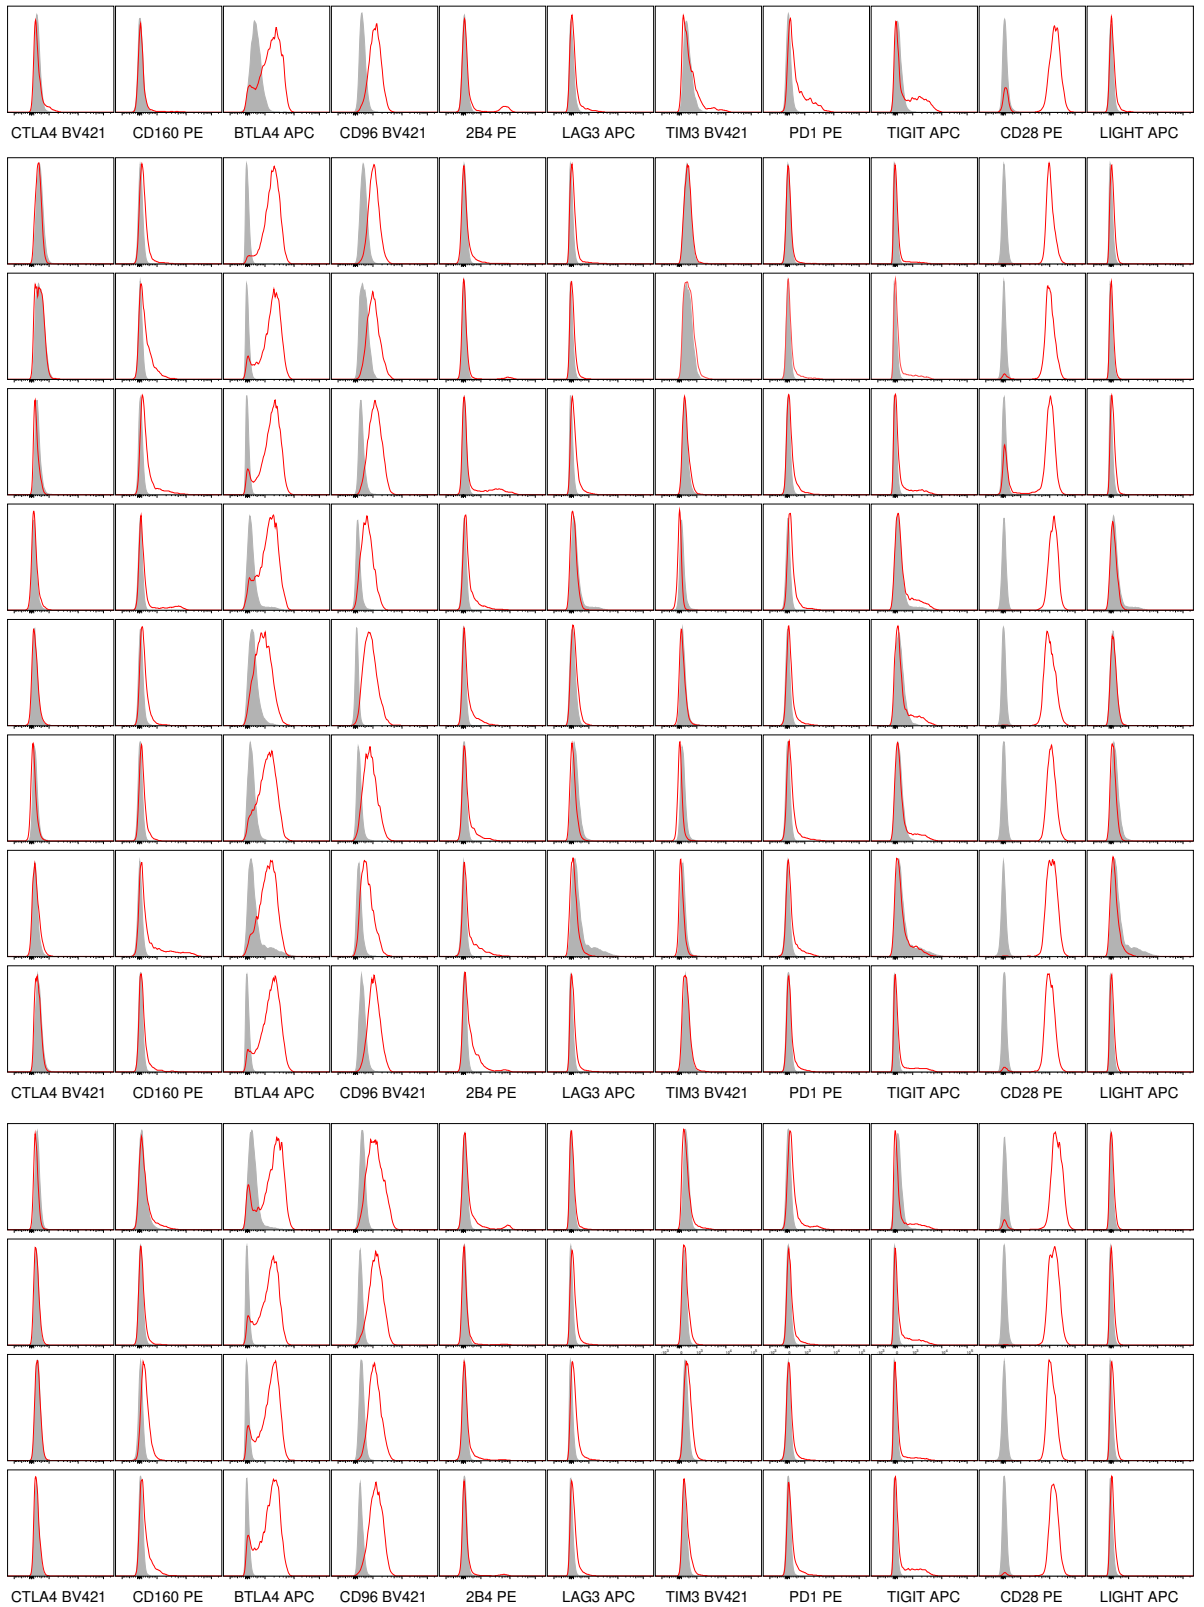

B

CD8+ T cells

PML patient

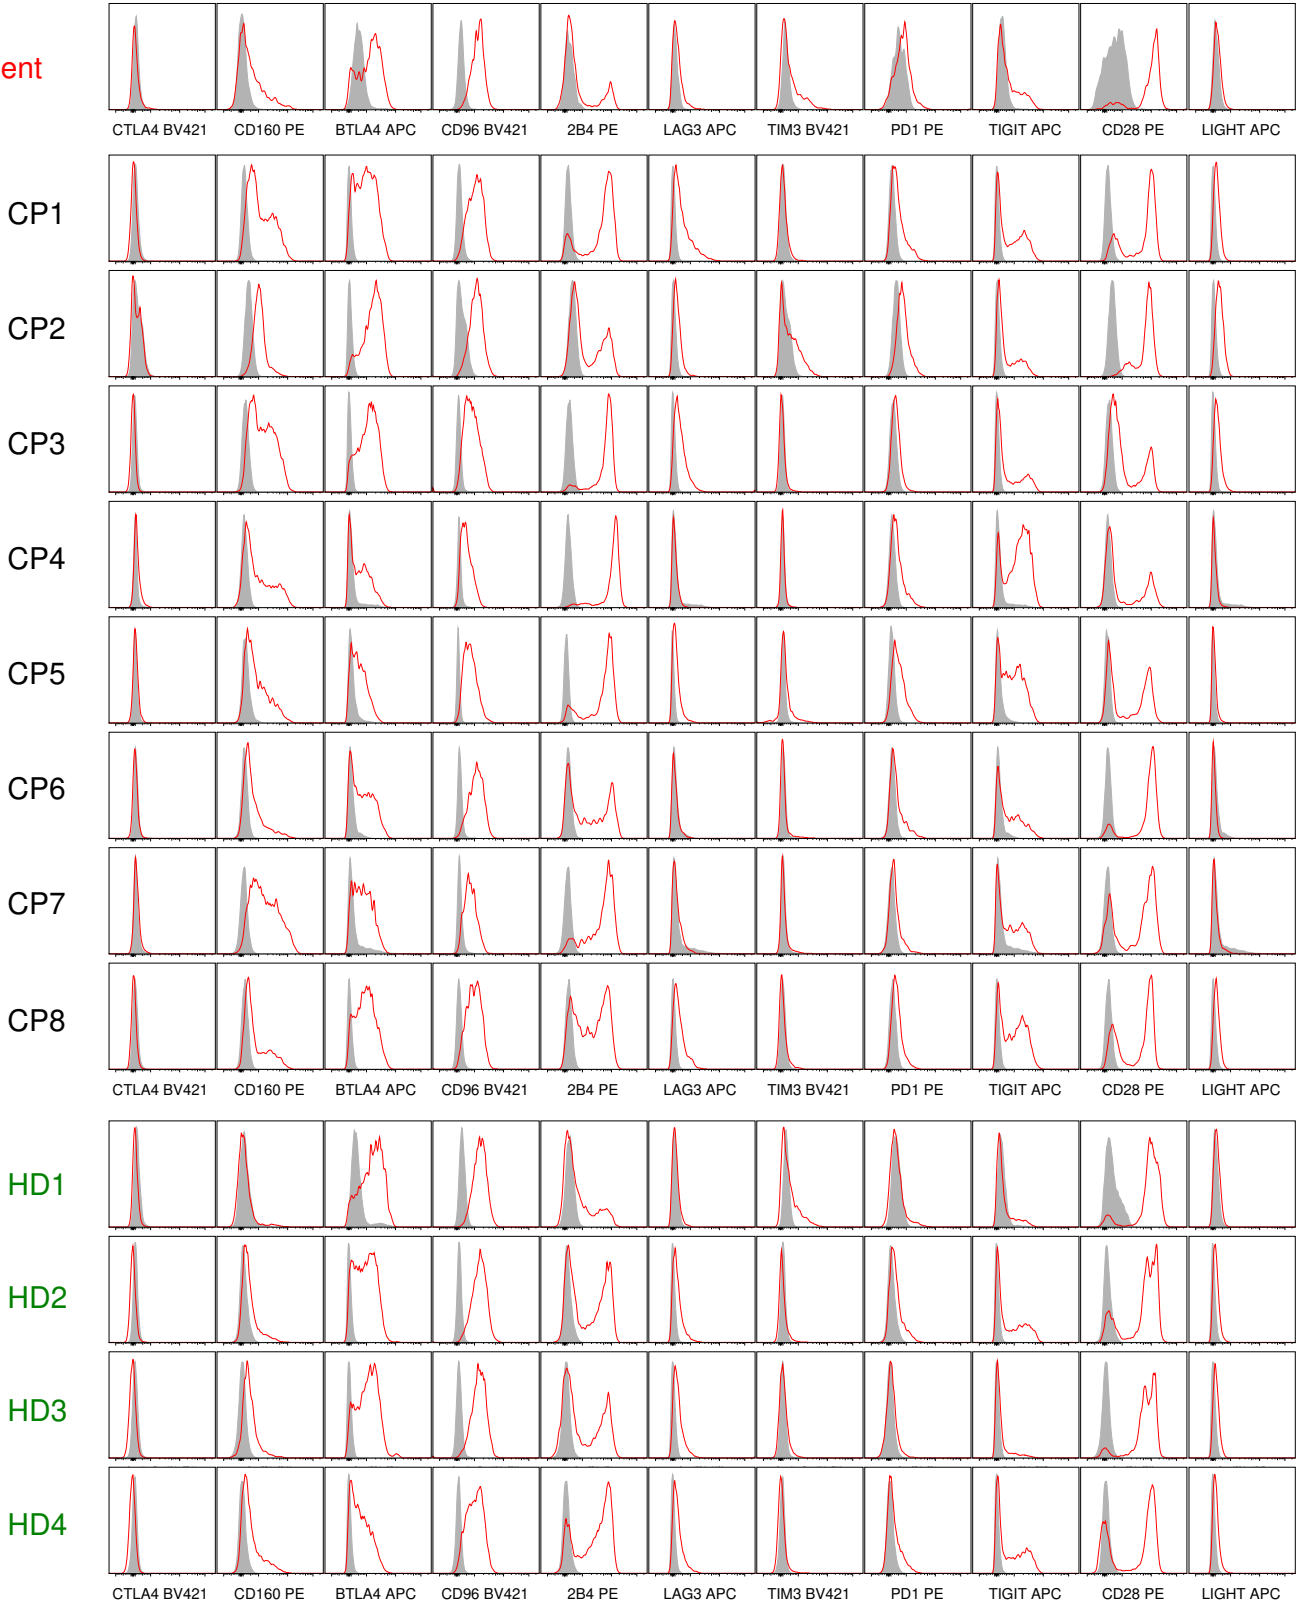

Supplement: JHA2-3-958-s001.pdf [file JHA2-3-958-s001.pdf]
